# Supplementary material for: Exploratory Study of the Relationship between an Oral Fungal Swab Test and Patient Blood Test Data
Source: MDPI journal article supplement (doi:10.3390/microorganisms11122887), 2023-11-29
Supplement: s1 [file s1]

Table S1. Dataset on preliminary investigation.

| age | <i>Candida</i> | sex    |
|-----|----------------|--------|
| 39  | 0              | Female |
| 70  | 1              | Female |
| 76  | 0              | Female |
| 70  | 1              | Male   |
| 50  | 1              | Female |
| 72  | 1              | Female |
| 53  | 0              | Female |
| 61  | 0              | Male   |
| 80  | 1              | Female |
| 74  | 0              | Female |
| 81  | 1              | Female |
| 78  | 1              | Female |
| 48  | 0              | Female |
| 73  | 1              | Female |
| 57  | 1              | Female |
| 81  | 0              | Female |
| 69  | 0              | Female |
| 66  | 0              | Male   |
| 77  | 1              | Female |
| 54  | 0              | Female |
| 72  | 1              | Female |
| 64  | 1              | Female |
| 73  | 1              | Male   |
| 43  | 0              | Male   |
| 75  | 1              | Female |
| 44  | 0              | Female |
| 83  | 1              | Female |
| 88  | 1              | Male   |
| 66  | 0              | Male   |
| 79  | 0              | Female |
| 79  | 1              | Female |
| 88  | 0              | Female |
| 60  | 0              | Female |
| 49  | 0              | Female |
| 71  | 1              | Male   |
| 64  | 1              | Female |

|    |   |        |
|----|---|--------|
| 87 | 0 | Female |
| 62 | 1 | Female |
| 84 | 0 | Female |
| 86 | 1 | Male   |
| 90 | 1 | Female |
| 73 | 0 | Female |
| 51 | 0 | Female |
| 48 | 1 | Female |
| 67 | 0 | Female |
| 63 | 0 | Female |
| 66 | 1 | Female |
| 75 | 1 | Male   |
| 91 | 1 | Female |
| 80 | 1 | Female |
| 51 | 0 | Female |
| 46 | 0 | Female |
| 86 | 1 | Male   |
| 50 | 1 | Female |
| 72 | 1 | Female |
| 79 | 1 | Female |
| 80 | 0 | Female |
| 75 | 1 | Female |
| 76 | 0 | Male   |
| 67 | 1 | Male   |
| 44 | 0 | Male   |
| 77 | 1 | Female |
| 62 | 0 | Male   |
| 77 | 1 | Female |
| 67 | 0 | Female |
| 35 | 0 | Female |
| 76 | 0 | Male   |
| 79 | 1 | Female |
| 71 | 1 | Female |
| 38 | 0 | Female |
| 62 | 1 | Male   |
| 41 | 0 | Female |
| 41 | 1 | Female |
| 94 | 1 | Male   |

|    |   |        |
|----|---|--------|
| 83 | 0 | Female |
| 41 | 0 | Female |
| 73 | 1 | Female |
| 61 | 0 | Female |
| 67 | 0 | Female |
| 84 | 1 | Male   |
| 67 | 0 | Male   |
| 76 | 0 | Male   |
| 69 | 0 | Female |
| 59 | 0 | Female |
| 75 | 0 | Female |
| 68 | 0 | Female |
| 71 | 0 | Female |
| 56 | 1 | Female |
| 77 | 0 | Male   |
| 67 | 0 | Female |
| 68 | 0 | Female |
| 53 | 0 | Female |
| 75 | 1 | Female |
| 69 | 0 | Female |
| 72 | 1 | Female |
| 61 | 0 | Male   |
| 47 | 0 | Male   |
| 59 | 0 | Female |
| 62 | 0 | Female |
| 74 | 1 | Female |
| 56 | 1 | Female |
| 55 | 1 | Female |
| 81 | 1 | Female |
| 50 | 0 | Female |
| 53 | 0 | Male   |
| 74 | 0 | Male   |
| 60 | 0 | Male   |
| 54 | 1 | Female |
| 67 | 0 | Female |
| 68 | 0 | Female |
| 71 | 0 | Female |
| 49 | 0 | Female |

|    |   |        |
|----|---|--------|
| 58 | 1 | Female |
| 64 | 0 | Female |
| 75 | 1 | Male   |
| 57 | 0 | Male   |
| 56 | 0 | Female |
| 81 | 1 | Female |
| 73 | 0 | Male   |
| 79 | 0 | Female |
| 52 | 0 | Female |
| 84 | 0 | Female |
| 59 | 0 | Female |
| 66 | 1 | Male   |
| 78 | 0 | Male   |
| 78 | 0 | Female |
| 55 | 0 | Male   |
| 46 | 0 | Female |
| 78 | 1 | Female |
| 72 | 1 | Female |
| 72 | 0 | Male   |
| 50 | 1 | Female |
| 51 | 0 | Female |
| 54 | 0 | Female |
| 65 | 0 | Female |
| 75 | 0 | Male   |
| 72 | 0 | Female |
| 55 | 0 | Female |
| 73 | 1 | Female |
| 36 | 1 | Male   |
| 76 | 1 | Male   |
| 52 | 0 | Female |
| 78 | 0 | Female |
| 74 | 0 | Female |
| 77 | 0 | Female |
| 48 | 0 | Female |
| 71 | 0 | Male   |
| 76 | 1 | Female |
| 41 | 0 | Female |
| 67 | 0 | Female |

|    |   |        |
|----|---|--------|
| 65 | 0 | Female |
| 79 | 1 | Female |
| 75 | 1 | Female |
| 73 | 0 | Female |
| 71 | 0 | Female |
| 64 | 0 | Female |
| 57 | 0 | Female |
| 64 | 0 | Male   |
| 75 | 0 | Female |
| 68 | 1 | Female |
| 71 | 0 | Female |
| 71 | 0 | Female |
| 63 | 0 | Female |
| 56 | 0 | Female |
| 77 | 0 | Female |
| 43 | 0 | Female |
| 58 | 0 | Female |
| 49 | 1 | Female |
| 67 | 1 | Female |
| 58 | 1 | Male   |
| 52 | 0 | Male   |
| 58 | 0 | Female |
| 56 | 1 | Female |
| 20 | 0 | Male   |
| 59 | 0 | Male   |
| 47 | 0 | Female |
| 59 | 0 | Female |
| 58 | 0 | Female |
| 57 | 0 | Female |
| 71 | 0 | Male   |
| 72 | 0 | Female |
| 67 | 0 | Female |
| 62 | 0 | Female |
| 78 | 0 | Female |
| 65 | 0 | Female |
| 72 | 0 | Male   |
| 63 | 0 | Female |
| 48 | 1 | Female |

|    |   |        |
|----|---|--------|
| 50 | 0 | Female |
| 59 | 1 | Female |
| 45 | 0 | Female |
| 57 | 1 | Female |
| 76 | 0 | Female |
| 65 | 0 | Male   |
| 66 | 0 | Female |
| 66 | 0 | Male   |
| 52 | 0 | Female |
| 51 | 1 | Male   |
| 69 | 1 | Female |
| 65 | 1 | Male   |
| 55 | 0 | Male   |
| 43 | 1 | Male   |
| 75 | 0 | Male   |
| 65 | 0 | Female |
| 78 | 0 | Female |
| 47 | 0 | Female |
| 47 | 1 | Female |
| 71 | 1 | Female |
| 83 | 0 | Female |
| 66 | 0 | Male   |
| 66 | 0 | Male   |
| 75 | 0 | Male   |
| 80 | 1 | Female |
| 71 | 1 | Male   |
| 66 | 0 | Female |
| 90 | 0 | Female |
| 44 | 1 | Female |
| 48 | 0 | Female |
| 67 | 0 | Female |
| 84 | 0 | Female |
| 54 | 0 | Female |
| 77 | 0 | Female |
| 76 | 1 | Female |
| 75 | 0 | Female |
| 74 | 1 | Female |
| 72 | 0 | Female |

|    |   |        |
|----|---|--------|
| 75 | 0 | Female |
| 69 | 0 | Female |
| 58 | 0 | Female |
| 50 | 0 | Female |
| 59 | 0 | Female |
| 56 | 0 | Female |
| 73 | 1 | Male   |
| 62 | 0 | Female |
| 75 | 1 | Female |
| 19 | 0 | Female |
| 76 | 0 | Male   |
| 86 | 0 | Female |
| 63 | 0 | Female |
| 71 | 0 | Male   |
| 66 | 1 | Female |
| 75 | 0 | Female |
| 67 | 1 | Female |
| 72 | 0 | Male   |
| 62 | 1 | Male   |
| 48 | 0 | Female |
| 69 | 1 | Female |
| 73 | 0 | Male   |
| 72 | 0 | Female |
| 44 | 0 | Male   |
| 63 | 0 | Female |
| 66 | 0 | Male   |
| 52 | 0 | Female |
| 68 | 0 | Male   |
| 67 | 0 | Male   |
| 69 | 0 | Male   |
| 26 | 0 | Female |
| 79 | 1 | Female |
| 80 | 1 | Female |
| 72 | 1 | Female |
| 73 | 1 | Male   |
| 74 | 1 | Female |
| 89 | 1 | Male   |
| 53 | 0 | Female |

|    |   |        |
|----|---|--------|
| 73 | 1 | Male   |
| 73 | 0 | Female |
| 76 | 1 | Male   |
| 77 | 1 | Female |
| 81 | 1 | Female |
| 69 | 0 | Female |
| 64 | 1 | Female |
| 68 | 1 | Female |
| 76 | 0 | Female |
| 54 | 1 | Female |
| 71 | 0 | Female |
| 75 | 1 | Female |
| 64 | 0 | Female |
| 71 | 0 | Female |
| 72 | 0 | Female |
| 65 | 0 | Female |
| 74 | 0 | Male   |
| 77 | 0 | Female |
| 75 | 0 | Male   |
| 50 | 0 | Female |
| 68 | 0 | Female |
| 79 | 1 | Male   |
| 73 | 0 | Female |
| 71 | 0 | Female |
| 67 | 0 | Female |
| 81 | 1 | Female |
| 66 | 0 | Female |
| 57 | 0 | Female |
| 57 | 0 | Female |
| 72 | 1 | Male   |
| 63 | 1 | Female |
| 59 | 0 | Female |
| 47 | 0 | Male   |
| 19 | 1 | Male   |
| 56 | 1 | Male   |
| 52 | 0 | Female |
| 66 | 0 | Female |
| 79 | 0 | Female |



|    |   |        |
|----|---|--------|
| 56 | 1 | Female |
| 64 | 1 | Female |
| 33 | 0 | Female |
| 69 | 1 | Female |
| 68 | 1 | Female |
| 56 | 0 | Male   |
| 66 | 0 | Female |
| 82 | 1 | Male   |
| 24 | 1 | Female |
| 63 | 0 | Female |
| 73 | 1 | Female |
| 73 | 1 | Male   |
| 74 | 1 | Male   |
| 62 | 1 | Female |
| 56 | 0 | Female |
| 84 | 0 | Female |
| 86 | 1 | Female |
| 75 | 0 | Female |
| 65 | 0 | Female |
| 68 | 0 | Male   |
| 74 | 0 | Female |
| 74 | 1 | Female |
| 67 | 0 | Female |
| 81 | 0 | Female |
| 82 | 0 | Male   |
| 61 | 0 | Male   |
| 57 | 0 | Female |
| 72 | 1 | Male   |
| 79 | 1 | Female |
| 57 | 0 | Female |
| 70 | 1 | Female |
| 52 | 0 | Female |
| 63 | 1 | Female |
| 68 | 0 | Male   |
| 82 | 0 | Male   |
| 76 | 0 | Female |
| 54 | 1 | Female |
| 71 | 0 | Female |

|    |   |        |
|----|---|--------|
| 75 | 1 | Female |
| 72 | 0 | Female |
| 77 | 1 | Male   |
| 55 | 0 | Female |
| 72 | 1 | Female |
| 37 | 0 | Female |
| 83 | 1 | Female |
| 70 | 0 | Female |
| 74 | 0 | Female |
| 85 | 1 | Female |
| 65 | 0 | Male   |
| 73 | 1 | Female |
| 64 | 0 | Female |
| 67 | 1 | Female |
| 77 | 0 | Female |
| 47 | 0 | Female |
| 67 | 1 | Female |
| 36 | 0 | Female |
| 62 | 0 | Female |
| 83 | 0 | Female |
| 55 | 0 | Female |
| 79 | 1 | Female |
| 80 | 1 | Male   |
| 69 | 0 | Male   |
| 71 | 1 | Male   |
| 76 | 1 | Female |
| 58 | 1 | Female |
| 62 | 0 | Female |
| 79 | 0 | Female |
| 49 | 1 | Female |
| 60 | 0 | Female |
| 65 | 0 | Female |
| 68 | 1 | Male   |
| 82 | 0 | Male   |
| 67 | 0 | Female |
| 53 | 0 | Female |
| 63 | 1 | Female |
| 71 | 1 | Female |

|    |   |        |
|----|---|--------|
| 62 | 1 | Female |
| 80 | 1 | Female |
| 51 | 1 | Female |
| 80 | 1 | Male   |
| 65 | 0 | Female |
| 76 | 1 | Female |
| 56 | 0 | Female |
| 81 | 1 | Male   |
| 71 | 1 | Female |
| 54 | 1 | Female |
| 86 | 1 | Female |
| 68 | 1 | Female |
| 85 | 1 | Female |
| 74 | 1 | Female |
| 43 | 0 | Female |
| 73 | 0 | Male   |
| 73 | 1 | Female |
| 88 | 1 | Male   |
| 56 | 1 | Female |
| 55 | 1 | Female |
| 51 | 0 | Female |
| 50 | 0 | Female |
| 77 | 1 | Female |
| 68 | 1 | Female |
| 54 | 1 | Female |
| 62 | 1 | Female |
| 62 | 0 | Female |
| 68 | 0 | Female |
| 71 | 0 | Female |
| 66 | 0 | Male   |
| 72 | 0 | Male   |
| 66 | 1 | Male   |
| 54 | 0 | Male   |
| 68 | 1 | Female |
| 57 | 0 | Male   |
| 71 | 1 | Female |
| 64 | 0 | Female |
| 75 | 1 | Male   |

|    |   |        |
|----|---|--------|
| 57 | 0 | Male   |
| 71 | 0 | Female |
| 81 | 1 | Female |
| 73 | 0 | Male   |
| 79 | 0 | Female |
| 46 | 0 | Female |
| 53 | 0 | Female |
| 51 | 0 | Female |

---
